# Supplementary material for: Myosin VI depletion delays neuromuscular junction maturation and exacerbates muscle performance
Source: Research Square preprint supplement (doi:10.21203/rs.3.rs-6965921/v1), 2025-08-05
Supplement: Supplementary file 1 [file c571551d15a9c5b366b230e5.pdf]

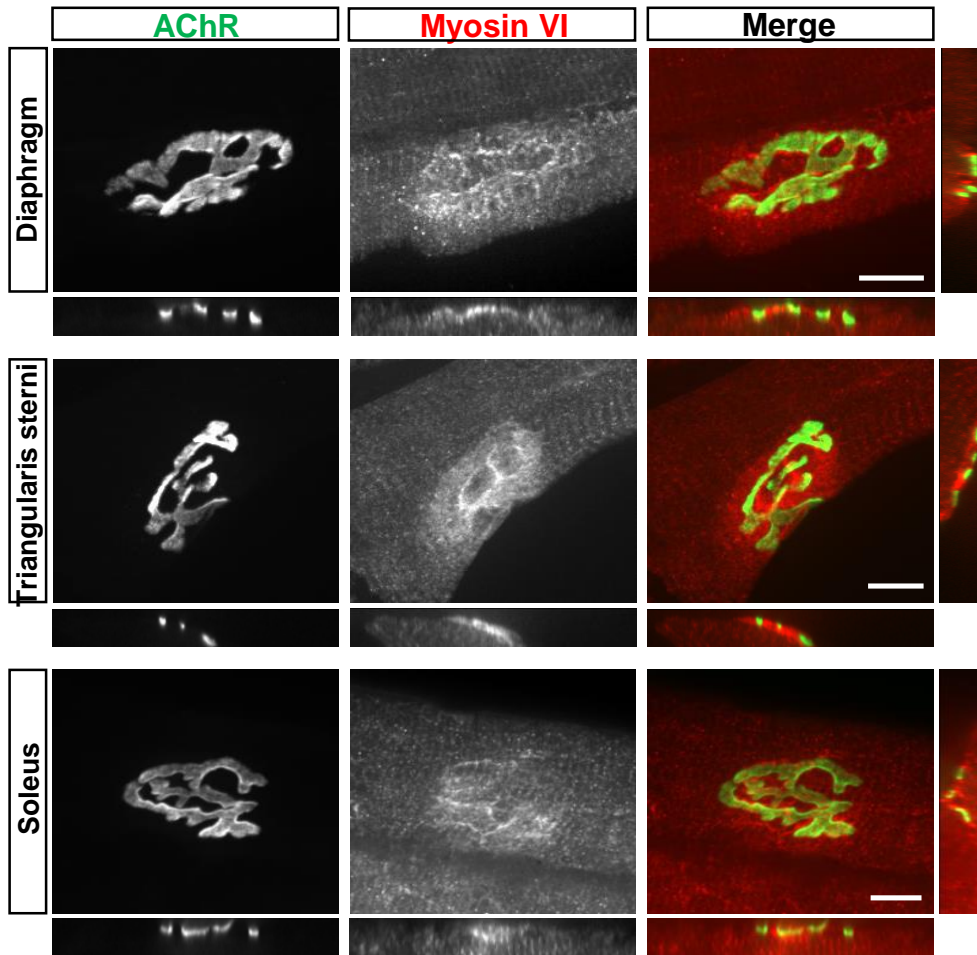

**Supplementary Figure 1. MVI is expressed at NMJs of various types of muscles.** Representative MVI localisation at NMJs in the diaphragm (fast) and the *Triangularis sterni* and soleus (slow) muscles at P45. MVI is enriched at the postsynaptic machinery in all analysed muscles (orthogonal views in lower and right panels). AChRs (green) are labelled with bungarotoxin ( $\alpha$ -BTX), and MVI (red) with anti-MVI antibody. Scale bars = 10  $\mu$ m.

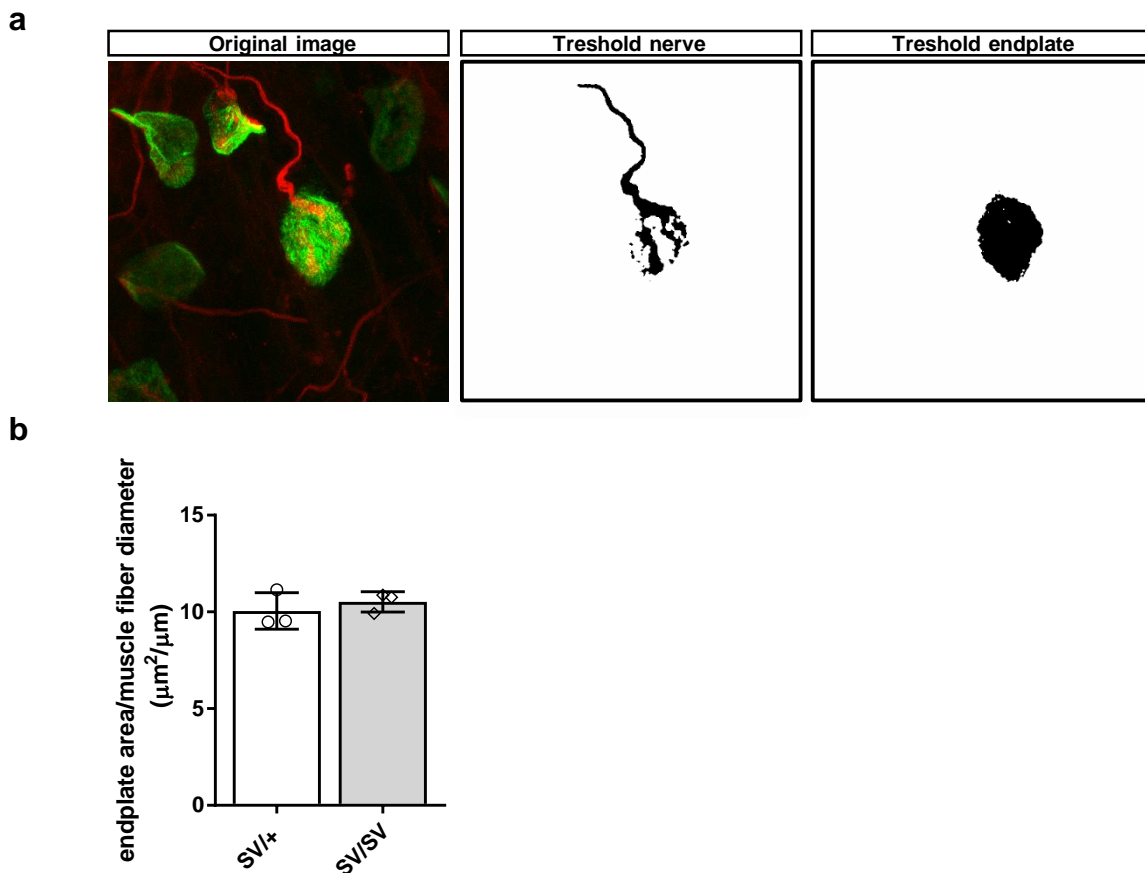

**Supplementary Figure 2. Decreased endplate area in SV mice correlates with the smaller muscle fibre diameter. (a)** Representative images showing the NMJ morphometric analysis with aNMJ-morph. Binary images on the right show digital reconstruction of presynaptic (threshold nerve) and postsynaptic NMJ domains (threshold endplate). Thresholding method – *Default*. **(b)** Endplate area normalised to muscle fibre diameter is similar in SV/+ and SV/SV mice, indicating that the reduced NMJ and muscle fibre size are associated. Two-tailed unpaired *t*-test, *N* = 3,  $\pm$ SD, \*  $p \leq 0.05$ , not significant.

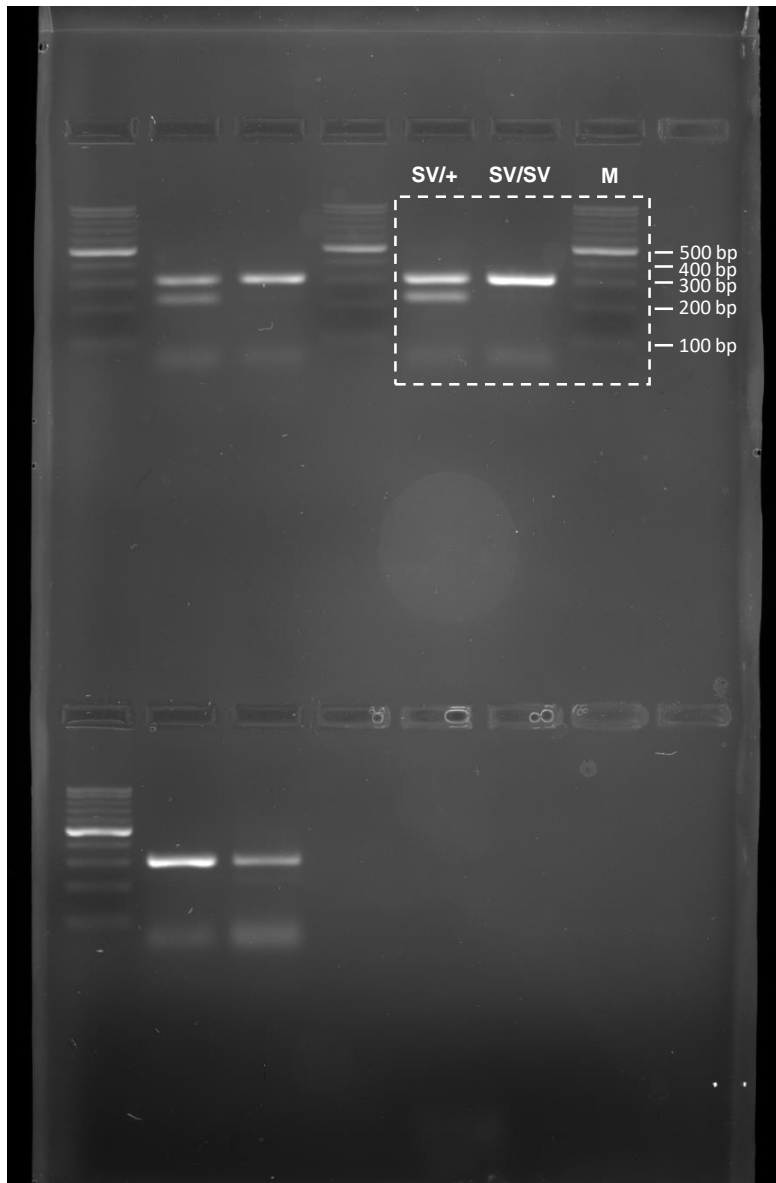

**Supplementary Figure 3. Original uncropped gel from Fig.2b.** SV/+, controls, heterozygotes (WT allele = 230 bp, SV allele = 318 bp). SV/SV, MVI knockouts, homozygotes (SV allele = 318 bp). M, DNA molecular weight marker, bp - base pairs. Dotted frame shows the cropped area.

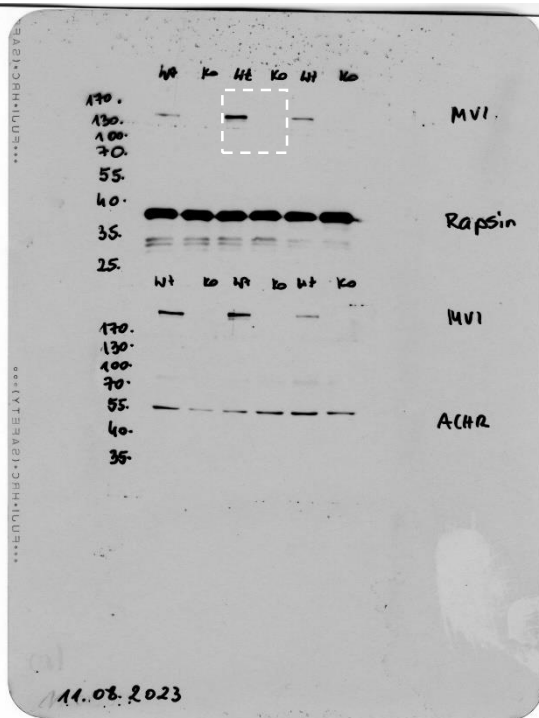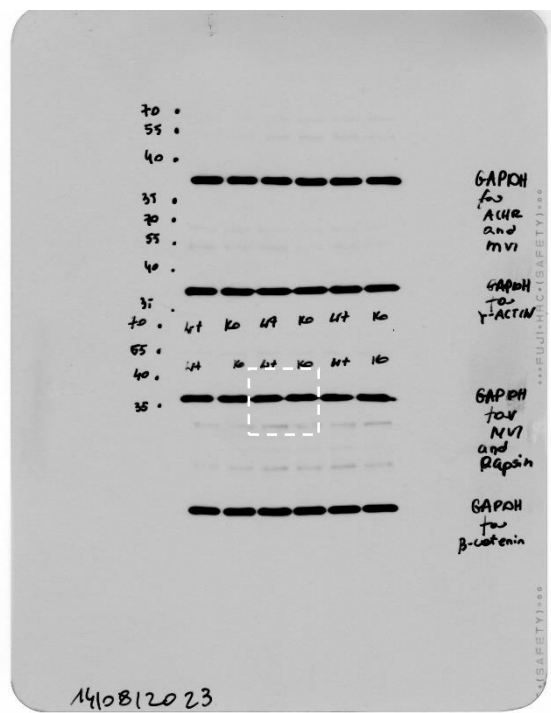

**Supplementary Figure 4. Original uncropped blots from Fig.2c. MVI (left) and GAPDH (right) protein levels. Dotted frames show the cropped areas.**

| Name                                            | Dilution                  | Supplier and catalogue number                                             |
|-------------------------------------------------|---------------------------|---------------------------------------------------------------------------|
| <b>Primary antibodies</b>                       |                           |                                                                           |
| anti-neurofilament (2H3)                        | 1:350-<br>1:1000 (IF)     | DSHB, Iowa, IA, USA; cat. #AB_2314897                                     |
| anti-Synaptophysin (Syn.)                       |                           | Synaptic Systems, Göttingen, Germany; cat. #101 004                       |
| anti-dystrophin                                 | 1:100 (IF)                | Abcam, cat. # ab7164                                                      |
| anti-Myosin VI                                  | 1:250 (IF)<br>1:1000 (WB) | Proteus BioSciences, Ramona, CA, USA; cat. #25-6791                       |
| Anti-GAPDH                                      | 1:25 000<br>(WB)          | Merck Millipore; MA, USA, cat. # MAB374                                   |
| <b>Secondary antibodies/fluorescent markers</b> |                           |                                                                           |
| <b>IF</b>                                       |                           |                                                                           |
| BTX-AlexaFluor 488/555                          | 1:500                     | ThermoFisher Scientific, Waltham, MA, USA; cat. #B13422/#B35451           |
| anti-mouse-AlexaFluor 488/555/647               | 1:100-800                 | ThermoFisher Scientific, Waltham, MA, USA; cat. #A28175/#A-31570/#A-21236 |
| anti-rabbit-AlexaFluor 555                      | 1:500-800                 | ThermoFisher Scientific, Waltham, MA, USA; cat. #A-11004                  |
| anti-guinea pig-AlexaFluor 647                  | 1:600                     | ThermoFisher Scientific, Waltham, MA, USA; cat. #A-21450                  |
| DAPI                                            | 1:1000                    | AppliChem, Darmstadt, Germany; cat. #A4099                                |
| <b>WB</b>                                       |                           |                                                                           |
| Anti-mouse-HRP                                  | 1:10 000                  | Merck Millipore; MA, USA, cat. # AP308P                                   |
| Anti-rabbit-HRP                                 |                           | Merck Millipore; MA, USA, cat. # AP307P                                   |

**Supplementary Table S1. List of antibodies and fluorescent markers.**
